# Supplementary material
Source: publisher site journal article supplement (https://www.dovepress.com/article/294217)
Supplement: Supplementary file 1 [file get_supplementary_file.php]

**Suppl. table S1**

| <b>FEV1 (%)</b>     |              |             |            |
|---------------------|--------------|-------------|------------|
|                     | Day 0        | 3 months    | 6 months   |
| Male, smokers       | 1,08 (27,01) | 1,14 (38,1) | 1,07 (36%) |
| Male, non-smokers   | 1,26 (43)    | 1,19 (40,3) | 1,13 (38)  |
| Female, smokers     | 0,98 (45,9)  | 0,92 (41,8) | 1,01 (45)  |
| Female, non-smokers | 0,74 (38)    | 0,77 (39)   | 0,72 (38)  |

**Suppl. table 2. Characteristics of patients who died during follow up**

| ID    | Age      | Sex | Baseline |             |         |           |          | 1 month | 3 months |        |        |     | 6 months |
|-------|----------|-----|----------|-------------|---------|-----------|----------|---------|----------|--------|--------|-----|----------|
|       |          |     | GOLD     | FEV1/L      | FEV1/%  | exa prior | EOS      | ICS     | EOS      | FEV1/l | FEV1/% | ICS |          |
| 6     | 70       | M   | D        | 0,7         | 24      | 0         | 0        | 0       | 0        | 0,7    | 25     | 0   |          |
| 24    | 77       | F   | D        | 0,97        | 53      | 1         | 0,49     | 0       | 0,49     | 0,58   | 32     | 1   |          |
| 45    | 86       | F   | D        | 0,41        | 23      | 1         | 0,47     | 0       | 0,19     | 0,24   | 13     | 0   |          |
| 55    | 81       | F   | D        | 0,6         | 37      | 0         | 0,13     | 1       |          |        |        |     |          |
| 59    | 62       | M   | D        | 1,19        | 33      | 1         | 0,35     | 0       |          |        |        |     |          |
| 99    | 65       | M   | B        | 0,66        | 21      | 1         | 0,22     | 0       |          |        |        |     |          |
| 100   | 66       | F   | D        | 0,25        | 12      | 1         | 0,17     | 0       |          |        |        |     |          |
| Mean  | 72,42857 |     |          | 0,682857    | 29      |           | 0,261429 |         |          |        |        |     |          |
| Range | 62-86    |     |          | 0,25 - 1,19 | 12 - 53 |           | 0 - 0,49 |         |          |        |        |     |          |

**Suppl. figure 1. Patients with  $\geq 2$  exacerbations prior to inclusion according to treatment during follow up**

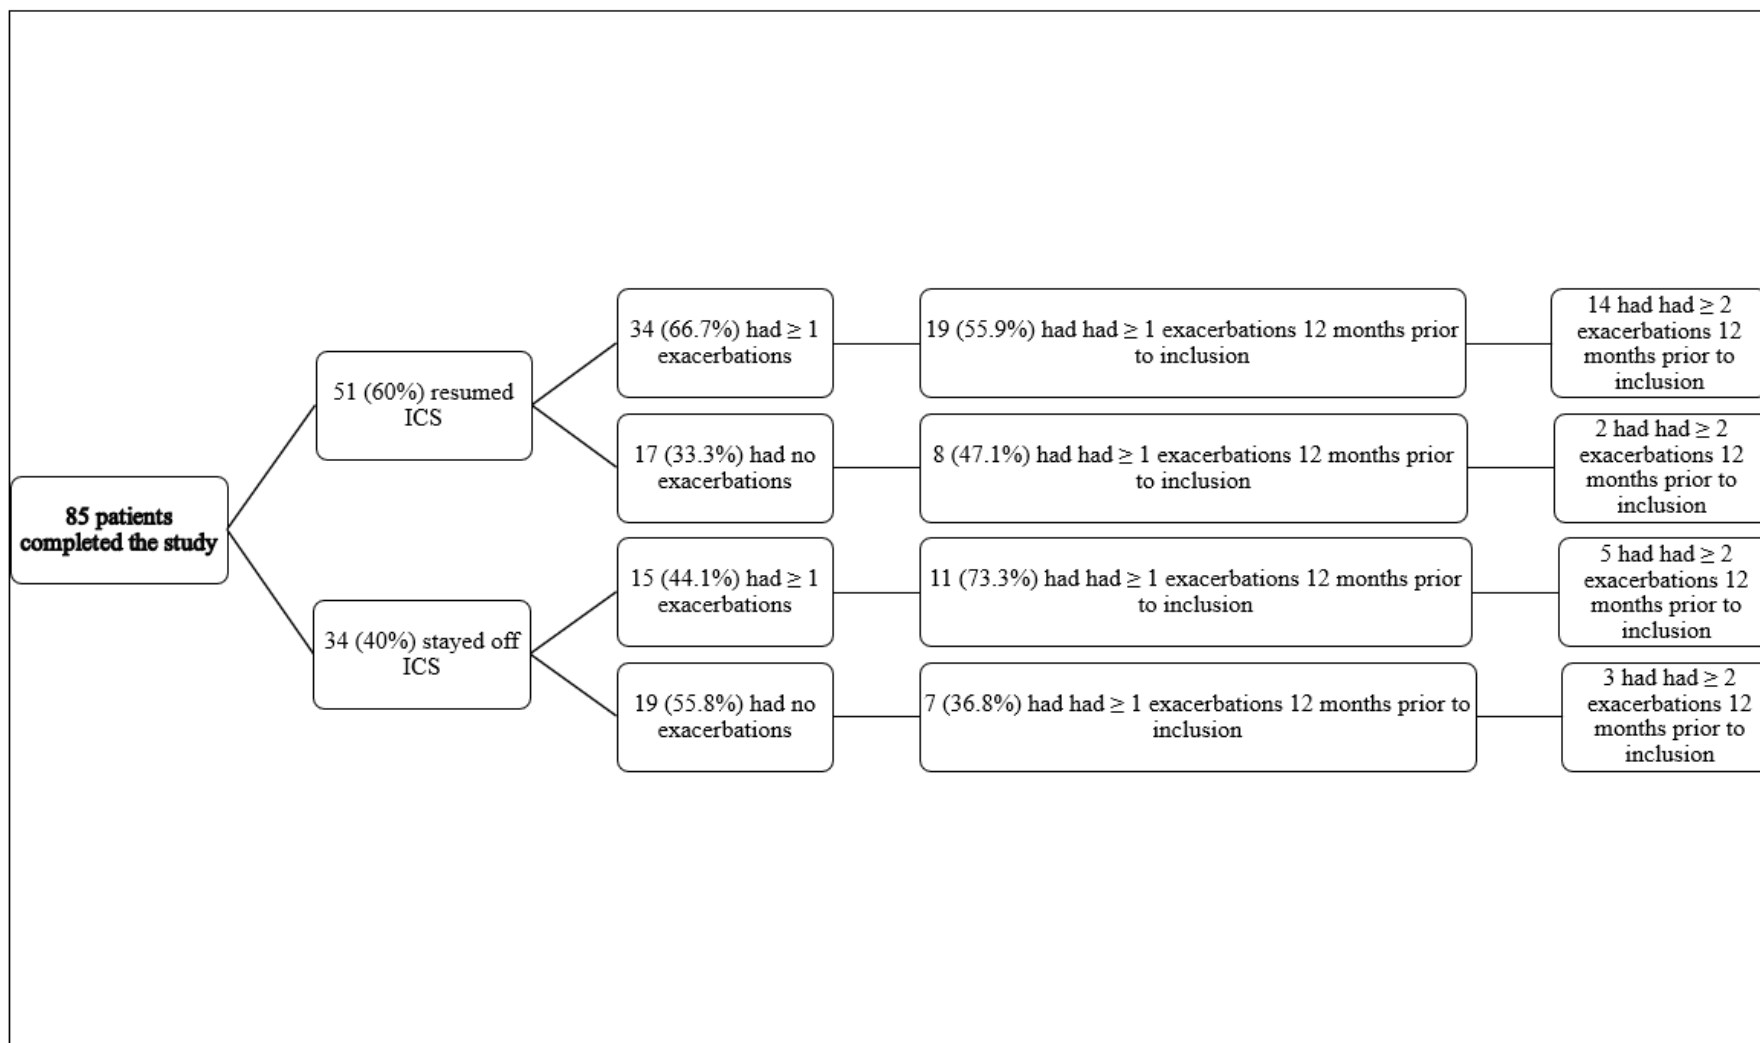

Numbers in paranthesis indicate percentages. ICS, inhaled corticosteroids.
